# Supplementary material for: Papillary tumor of the pineal region: analysis of DNA methylation profiles and clinical outcomes in 76 cases
Source: PubMed Central journal article supplement (PMC11251120; doi:10.1186/s40478-024-01781-4), 2024-07-16

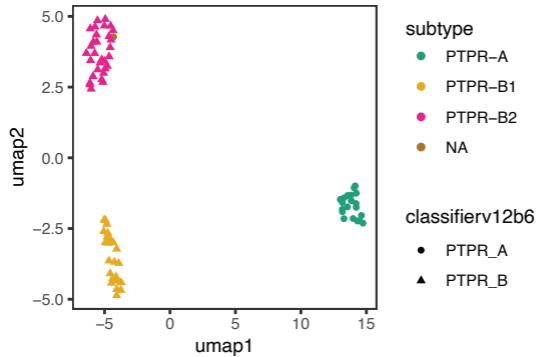

Supplement: 40478_2024_1781_MOESM1_ESM.pdf [file 40478_2024_1781_MOESM1_ESM.pdf]
